# Supplementary material for: BRAFV600E Induction in Thyrocytes Triggers Important Changes in the miRNAs Content and the Populations of Extracellular Vesicles Released in Thyroid Tumor Microenvironment
Source: MDPI journal article supplement (doi:10.3390/biomedicines10040755), 2022-03-23
Supplement: s1 [file s1]

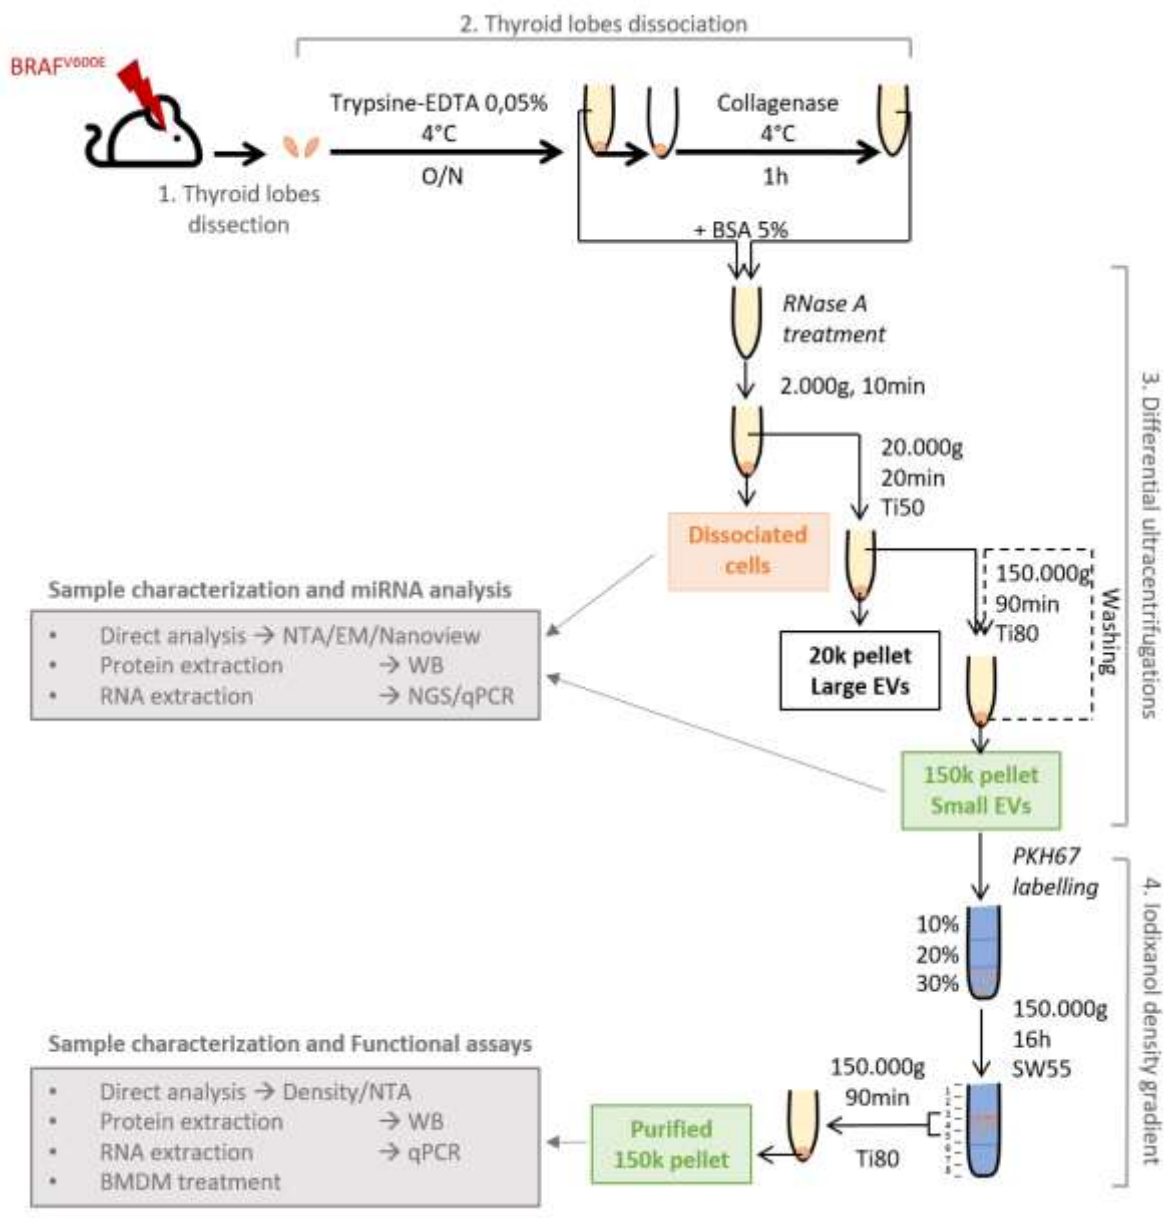

**Supplementary Figure S1: In vivo produced EVs are isolated from thyroid lobes by tissue dissociation followed by differential ultracentrifugation and optional iodixanol density gradient. Schematic representation of the procedure for EV isolation, characterization, and downstream analyses.**

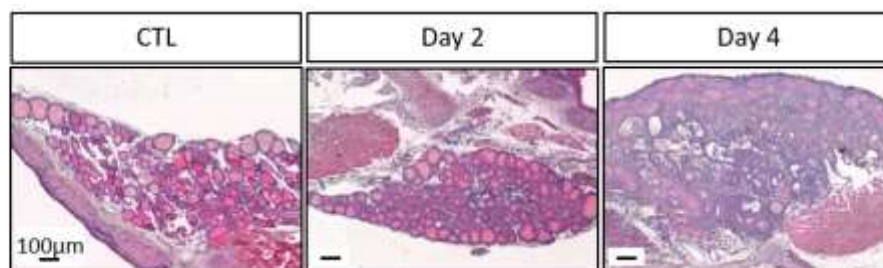

# **Supplementary Figure S2: BRAF<sup>FV600E</sup> expression in thyrocytes triggers tissue growth and remodelling**

Low-magnification view of the haematoxylin and eosin staining of thyroid tissues from control and doxycycline-treated mice, after 2 and 4 days of intraperitoneal injections, shown in Fig.1A.

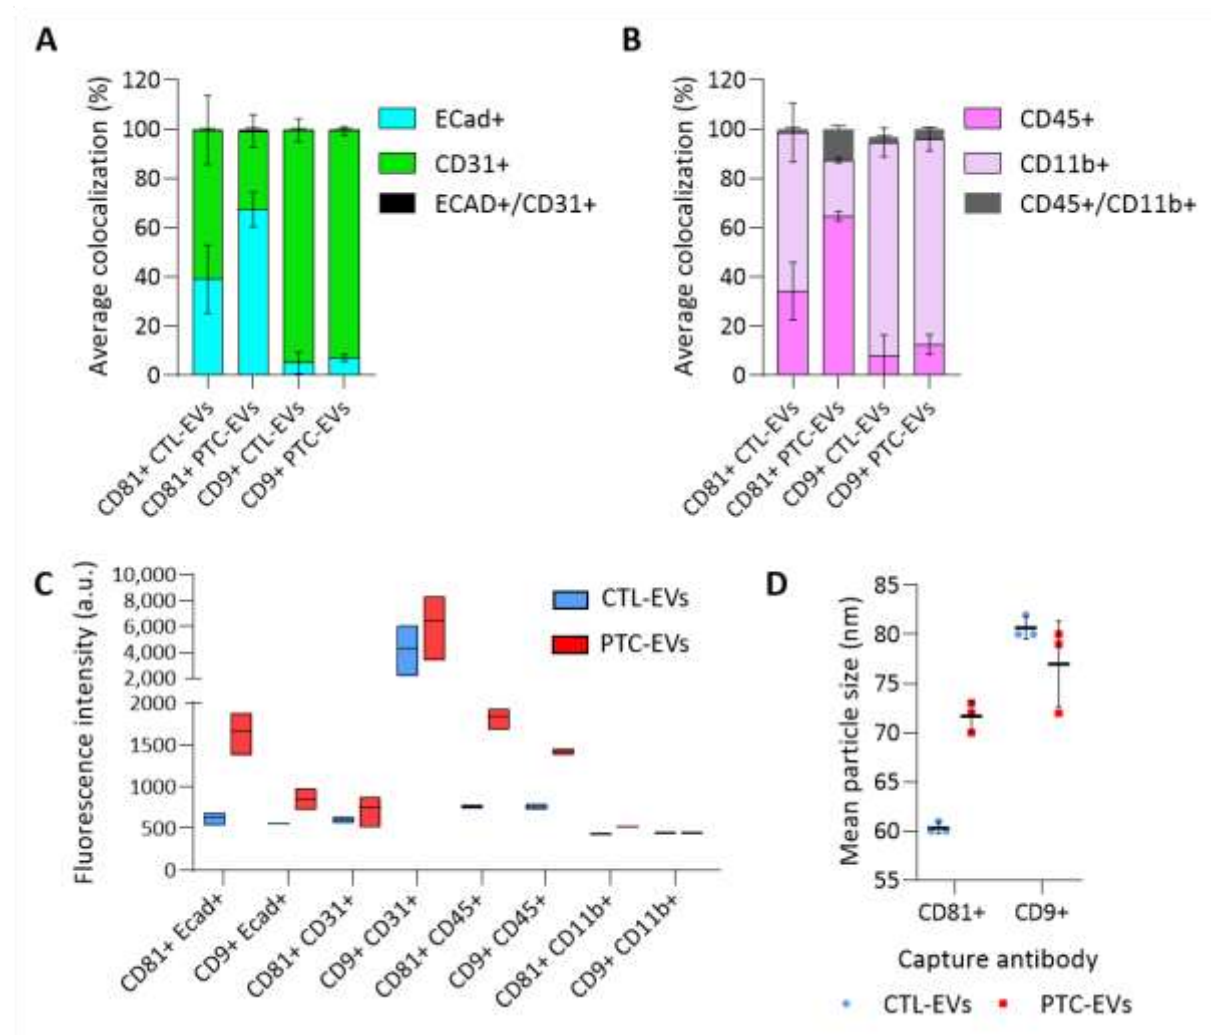

**Supplementary Figure S3: The ExoView platform allows EV population analyses. (A-B)** Average percentage of colocalization between Ecad and CD31 detection antibodies (A), and between CD45 and CD11b detection antibodies (B). (C) Fluorescence intensity of detection antibodies measured in CD9+ and CD81+ EV populations in control and PTC- EV samples, reflecting the number of detected epitopes. (D) Mean particles size of CD9+ and CD81+ EVs measured in CTL and PTC-EV samples.

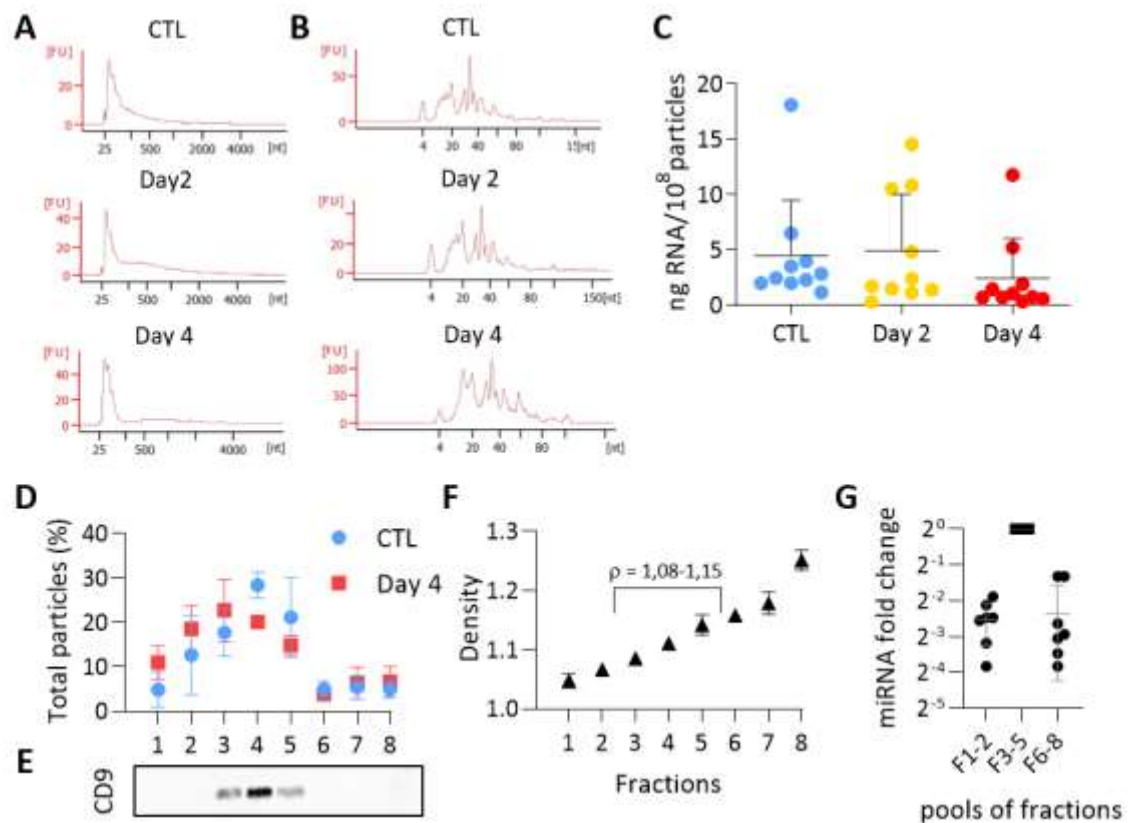

**Supplementary Figure S4: miRNAs detected in the high-speed pellets are associated with EV fractions after density-based fractionation.** Electrophoretic profiles of (A) total RNA, and (B) small RNA extracted from the 150k pellet isolated from control and DOX-treated thyroids, after 2 and 4 days of injections. (C) Total RNA quantity per 10<sup>8</sup> particles (measured by NTA). (D-G) Characterization of 8 fractions obtained after bottom-up iodixanol density gradient. (D) Distribution of particles measured by NTA. (E) Western blot detection of CD9 marker after purification of the 150k pellet isolated from day 4 DOX-treated thyroids. (F) Measure of the density of each fraction. (G) RT-qPCR analysis of 8 miRNAs in concentrated pools of fractions. Data are expressed as miRNA fold changes in pools of fractions 1-2 and 6-8 compared to their abundance in pool of fractions 3 to 5, considered as EV fractions.

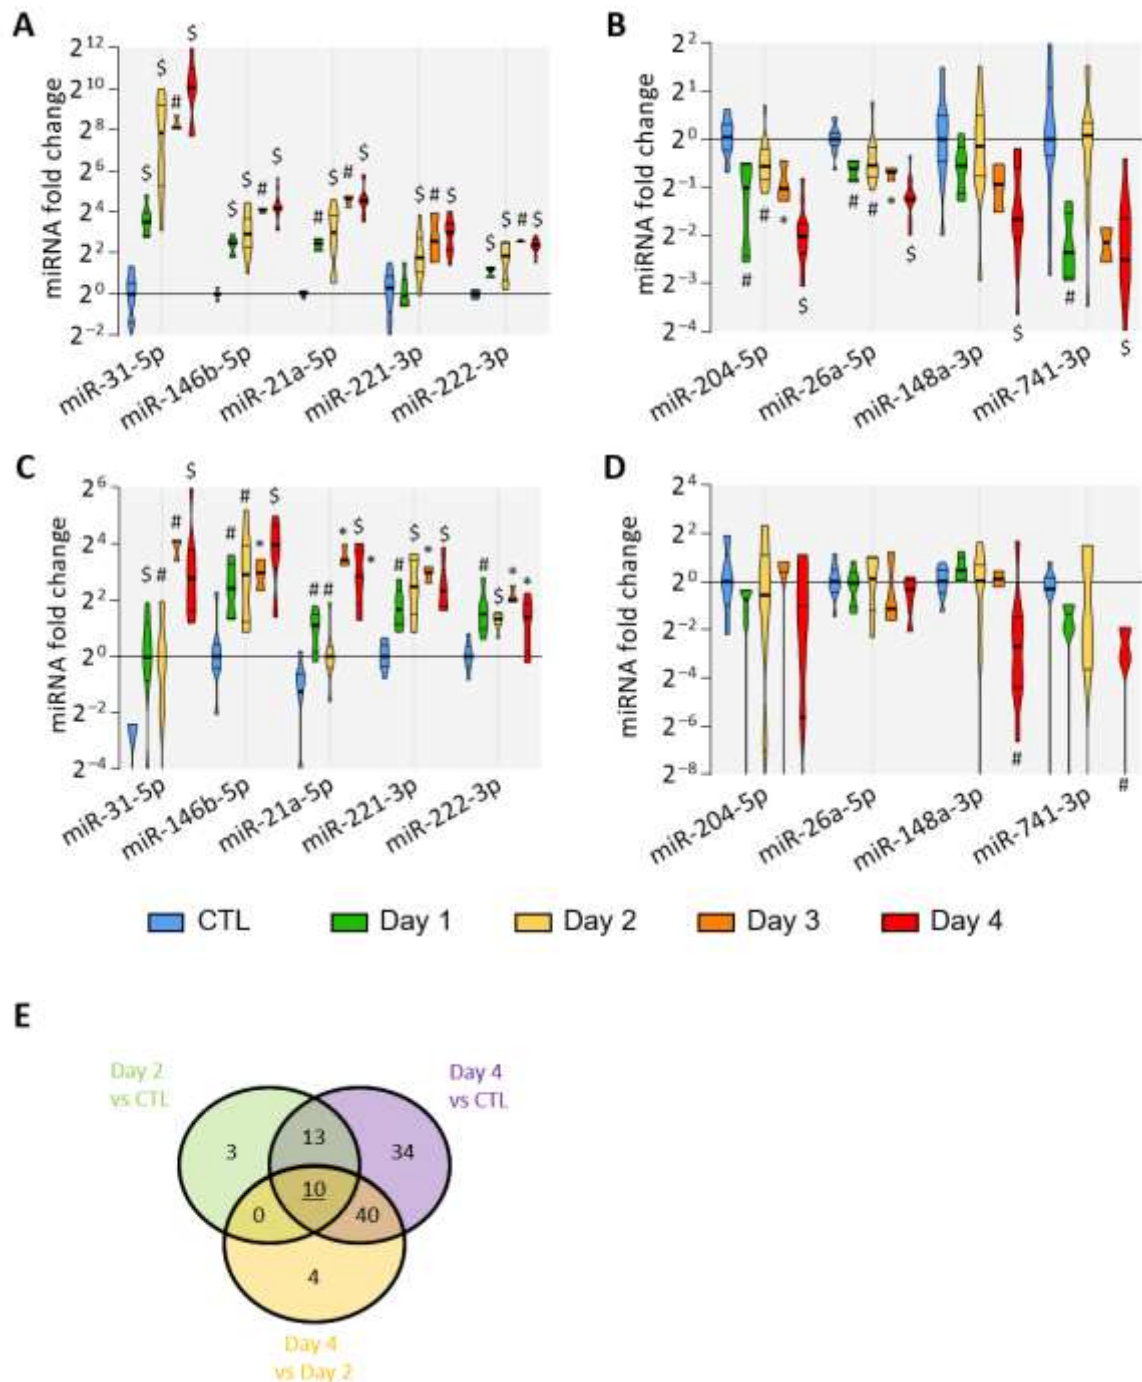

**Supplementary Figure S5: miRNAs display rapid and important changes in their abundance in BRAF<sup>V600E</sup> tissues and EVs.** RT-qPCR analyses of upregulated (A, B) and downregulated (C, D) miRNA in dissociated cells (A, C) and EVs (B, D) from control and doxycycline-treated thyroids after 1, 2, 3 and 4 days of injections (n≥4). MiRNA fold changes are normalized on let-7c-5p expression for cellular samples, and on the geometric mean of miR-126a-3p and let-7b-5p expression for EV samples. Data are expressed as mean ± SD (\* p<0.05; # p<0.01; \$ p<0.001). (E) Venn diagram illustrating the number of EV-miRNAs with differential abundance in the three groups. Abundance of 10 miRNAs was statistically different between the 3 groups.

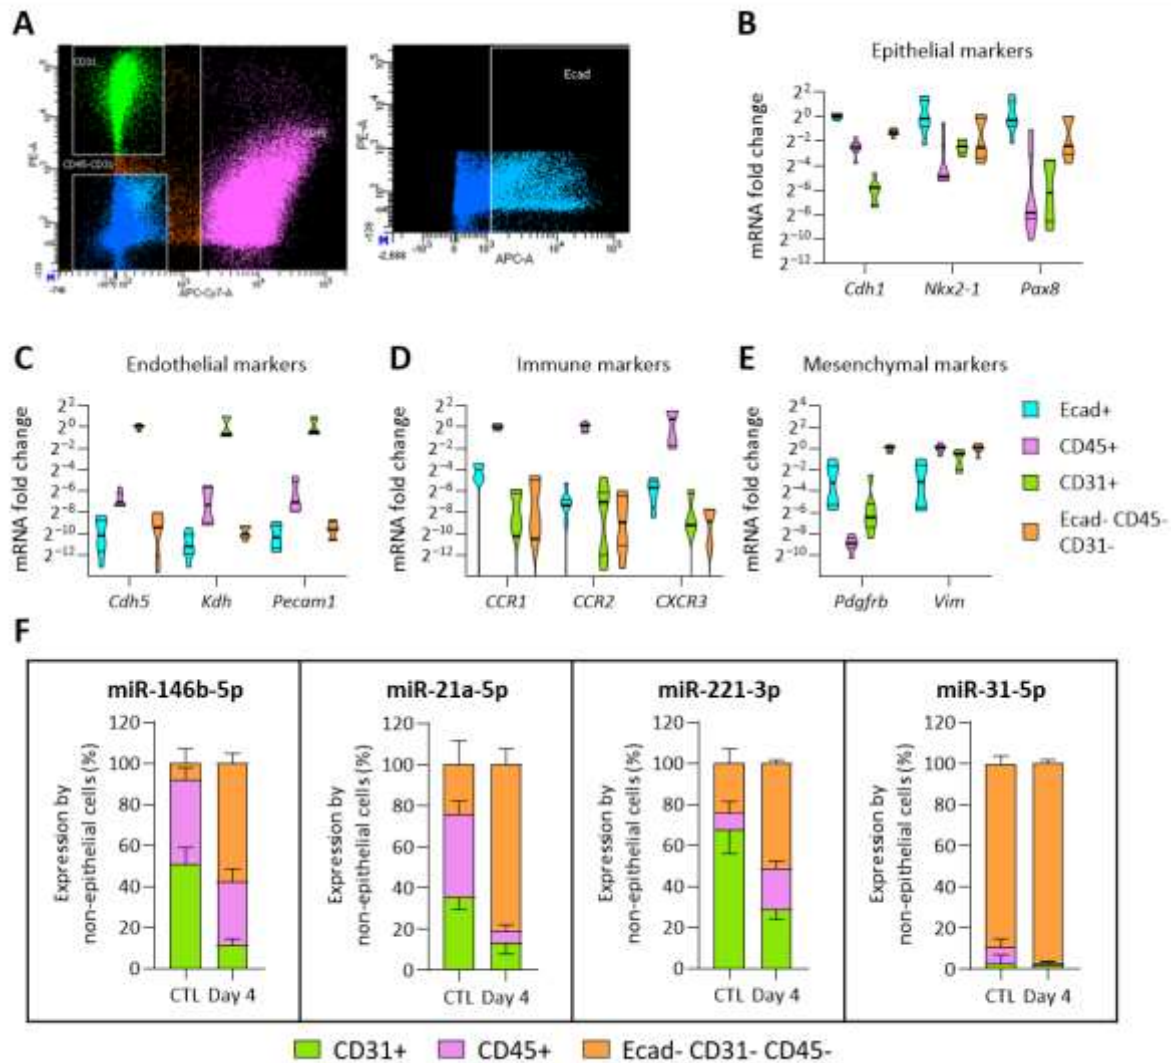

**Supplementary Figure S6: Purification of epithelial, endothelial and immune populations by FACS-sorting of thyroid and tumour dissociated cells using Ecad, CD31 and CD45 markers.** (A) Coloured dot plot showing an example of DOX day 4 dissociated cells sorting according to the intensity of fluorescence with CD31, CD45 or Ecad antibodies. (B-E) RT-qPCR analyses of the expression of epithelial (B), endothelial (C), immune (D) and mesenchymal (E) markers in sorted populations. mRNA fold changes are normalized on the geometric mean of *Rpl27* and *Gapdh* expression and compared to the expression in their respective population. (F) RT-qPCR analyses of miRNA expression in FACS-sorted non-epithelial cell populations. Stacked bars show the relative expression of the miRNAs in non-epithelial cell populations normalized by the quantity of RNA extracted from each population. Data are expressed as mean  $\pm$  SD.

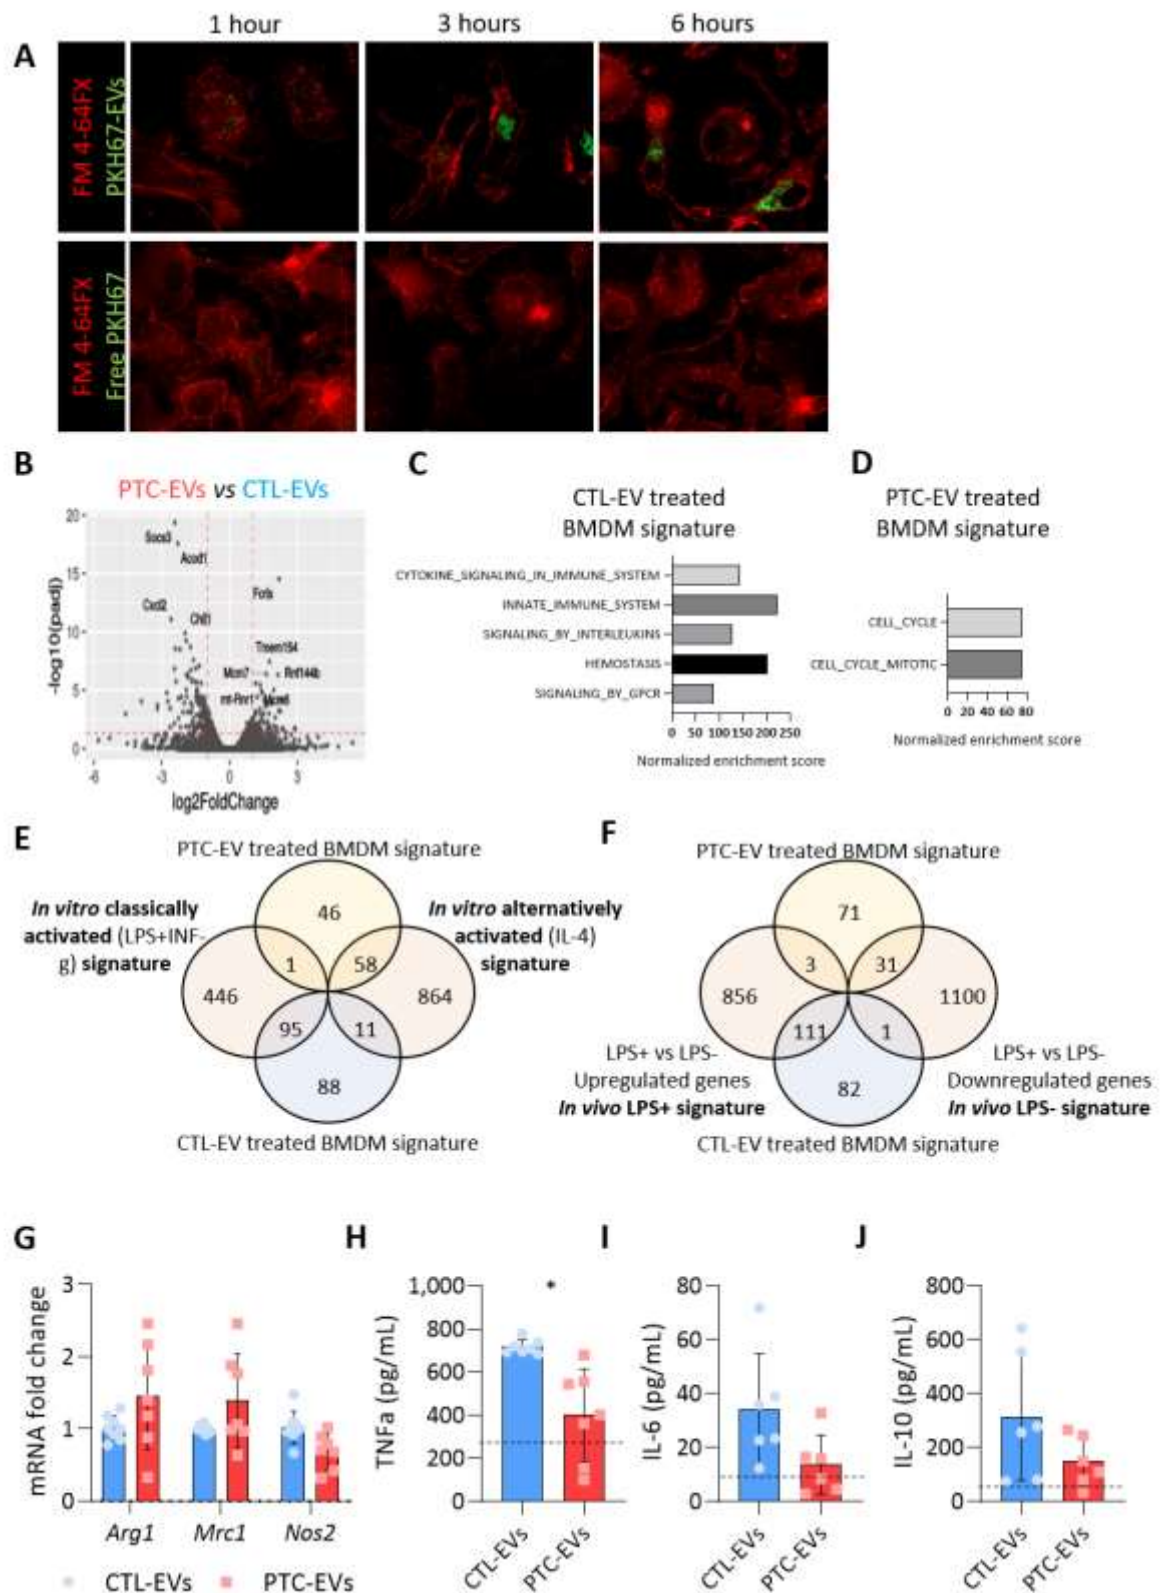

**Supplementary Figure S7: Treatment of BMDM with CTL-EVs or PTC-EVs pools demonstrate internalization but no major effects. (A)** Live imaging of BMDM fluorescently labelled by FM 4-64FX, a red membrane dye, and treated with PKH67-EVs or free PKH67 after 1, 3 or 6 hours of incubation. **(B)** Volcano plot showing p-adjusted value and fold change relation in differential analysis of mRNA

expression by CTL-EVs or PTC-EVs treated BMDM. KEGG pathway analysis of gene upregulated in CTL-EVs treated BMDM compared to PTC-EVs treated BMDM (C) and of gene upregulated in PTC-EVs treated BMDM compared to CTL-EVs treated BMDM (D). (E-F) Comparison of the mRNA signature of EV-treated BMDM with publicly available mRNA signature of (E) *in vitro* (LPS+INF $\gamma$  vs IL-4; GSE69607) or (F) *in vivo* (LPS+ vs LPS-; GSE38705) polarized macrophages (G). RT-qPCR analyses of *Arg1*, *Mrc1* and *Nos2* expression in non-treated, CTL-EVs or PTC-EVs treated BMDM (n=6). mRNA fold changes are normalized on the geometric mean of *Rpl27* and *Gapdh* expression. Data are expressed as mean  $\pm$  SD; differences are not significant. (H-J) Concentration of TNF $\alpha$ , IL-6 and IL-10 released in BMDM medium after 24h of treatment with CTL-EVs and PTC-EVs compared to the basal production level in non-treated BMDM (dotted line).

**Supplementary Table S1:** Sequences of primers used in mRNAs RT-qPCR.

| Gene          | Forward primer            | Reverse primer          |
|---------------|---------------------------|-------------------------|
| <i>Fos1</i>   | CCGGCCAGGAGTCATACG        | CTGCTAGCTTGTCCGCTCG     |
| <i>Dusp5</i>  | CCAGTGTGGAAAGCCCGTT       | CGCACTTGGATGCGTGTA      |
| <i>Pax8</i>   | CGGCGATGCCTCACAACCTCG     | CCGGATGCTGCCAGTCTCGT    |
| <i>Nkx2.1</i> | ATCTGAGCTGGGGTGCTGGG      | GCCCTGTCTGTACGCTGCGA    |
| <i>Nis</i>    | AGCAGGCTTAGCTGTATCCC      | AGCCCCGTAGTAGAGATAGGAG  |
| <i>Tg</i>     | TGGGACGTGAAAGGGGAATGGTGTC | GTGAGCTTTTGAATGGCAGGCGA |
| <i>Tpo</i>    | TGCCAACAGAAGCATGGGCAAC    | GCACAAAGTTCCCATTGTCCAC  |
| <i>Tshr</i>   | CTGCGGGGCAAAGAGTGTGC      | AGGGGAGCTCTGTCAAGGCA    |
| <i>Rpl27</i>  | GCCCTGGTGGCTGGAATTGACC    | AACTTGACCTTGGCCTCCCGC   |
| <i>Gapdh</i>  | TGCACCACCAACTGCTTAGC      | GGATGCAGGGATGATGTTCT    |

**Supplementary Table S2:** List of antibodies used.

| Antibodies used in western blot          |         |                |                             |             |                  |
|------------------------------------------|---------|----------------|-----------------------------|-------------|------------------|
| Antibody                                 | Isotype | Clone          | Supplier                    | Reference   | Working dilution |
| Calnexin                                 | Rabbit  | polyclonal     | Enzo                        | ADI-SPA-860 | 1:10000          |
| PDI                                      | Rabbit  | C81H6          | Cell signaling technologies | 3501        | 1:1000           |
| CD63                                     | Rat     | NVG-2          | Biolegend                   | 143902      | 1:500            |
| CD81                                     | Rabbit  | D502Q          | Cell signaling technologies | 10037       | 1:400            |
| CD9                                      | Rat     | KMC8.8         | eBiosciences                | 14-0091-82  | 1:200            |
| Alix                                     | Mouse   | C-11           | Santa Cruz                  | sc-271975   | 1:500            |
| Flotillin-1                              | Mouse   | 18/Flotillin-1 | BD transduction             | 610820      | 1:500            |
| Antibody used in immunohistofluorescence |         |                |                             |             |                  |
| Antibody                                 | Isotype | Clone          | Supplier                    | Reference   | Working dilution |

|                                                                                            |                     |              |                             |                  |                              |
|--------------------------------------------------------------------------------------------|---------------------|--------------|-----------------------------|------------------|------------------------------|
| <b>CD206</b>                                                                               | Rabbit              | E6T5J        | Cell signaling technologies | 24595            | 1:500                        |
| <b>Fluorochrome-conjugated antibodies for FACS, flow cytometry and ExoView experiments</b> |                     |              |                             |                  |                              |
| <b>Antibody</b>                                                                            | <b>Fluorochrome</b> | <b>Clone</b> | <b>Supplier</b>             | <b>Reference</b> | <b>Working concentration</b> |
| <b>CD3</b>                                                                                 | Alexa 700           | 17A2         | biolegend                   | 100216           | 10 µg/ml                     |
| <b>CD11b</b>                                                                               | BV510/FITC          | M1/70        | biolegend                   | 101263/101205    | 2 µg/ml                      |
| <b>CD31</b>                                                                                | PE                  | MEC13.3      | BD biosciences              | 553373           | 2 µg/ml                      |
| <b>CD45</b>                                                                                | APC-Cy7             | 30-F11       | BD biosciences              | 557659           | 1 µg/ml                      |
| <b>Ecad</b>                                                                                | Alexa 647           | DECMA-1      | biolegend                   | 147308           | 15 µg/ml                     |

**Supplementary Table S3:** Sequences of primers and probes used in miRNAs RT-qPCR. Sequence of Universal reverse primer is GGTGTCGTGGAGTCGGCAA

| miRNA ID        | Sequence                | Loop-Reverse primer                         | Forward primer               | Probe             |
|-----------------|-------------------------|---------------------------------------------|------------------------------|-------------------|
| mmu-miR-31-5p   | AGGCAAGAUUCUGGCAUAGCUG  | CTCAACTGGTGTCTGGAGTCGGCAATTCAGTTGAGCAGCTATG | ACACTCCAGCTGGGAGGCAAGATGCTG  | TCAGTTGAGCAGCTATG |
| mmu-miR-146b-5p | UGAGAACUGAAUCCAUAGGCU   | CTCAACTGGTGTCTGGAGTCGGCAATTCAGTTGAGAGCCTATG | ACACTCCAGCTGGGTGAGAACTGAATTC | TCAGTTGAGAGCCTAT  |
| mmu-miR-21a-5p  | UAGCUUAUCAGACUGAUGUUGA  | CTCAACTGGTGTCTGGAGTCGGCAATTCAGTTGAGTCAACATC | ACACTCCAGCTGGGTAGCTTATCAGACT | TCAGTTGAGTCAACATC |
| mmu-miR-222-3p  | AGCUACAUCUGGCUACUGGGU   | CTCAACTGGTGTCTGGAGTCGGCAATTCAGTTGAGACCCAGTA | ACACTCCAGCTGGGAGCTACATCTGGC  | TCAGTTGAGACCCAGT  |
| mmu-miR-221-3p  | AGCUACAUCUGGCUACUGGGU   | CTCAACTGGTGTCTGGAGTCGGCAATTCAGTTGAGAAACCCA  | ACACTCCAGCTGGGAGCTACATTTGCT  | TCAGTTGAGAAACCCA  |
| mmu-miR-26a-5p  | UUCAAGUAAUCCAGGAUAGGCU  | CTCAACTGGTGTCTGGAGTCGGCAATTCAGTTGAGAGCCTATC | ACACTCCAGCTGGGTCAAGTAATCCA   | TCAGTTGAGAGCCTATC |
| mmu-miR-204-5p  | UUCUUUUUGUCAUCCUAGCCU   | CTCAACTGGTGTCTGGAGTCGGCAATTCAGTTGAGAGGCATAG | ACACTCCAGCTGGGTCCCTTTGTCTAT  | TCAGTTGAGAGGCATAG |
| mmu-miR-148a-5p | AAAGUUUCUGAGACACUCCGACU | CTCAACTGGTGTCTGGAGTCGGCAATTCAGTTGAGAGTCGGAG | ACACTCCAGCTGGGAAAGTTCTGAGAC  | TCAGTTGAGAGTCGGAG |
| mmu-miR-148a-3p | UCAGUGACACUACAGAAUUGU   | CTCAACTGGTGTCTGGAGTCGGCAATTCAGTTGAGACAAAGTT | ACACTCCAGCTGGGTGAGTGACTACA   | TCAGTTGAGACAAAGTT |
| mmu-miR-741-3p  | UGAGAGAUGCCAUUCUAGUAGA  | CTCAACTGGTGTCTGGAGTCGGCAATTCAGTTGAGTCTACATA | ACACTCCAGCTGGGTGAGAGATGCCAT  | TCAGTTGAGTCTACATA |
| mmu-miR-30d-5p  | UGUAAACAUCCCGACUGGAAG   | CTCAACTGGTGTCTGGAGTCGGCAATTCAGTTGAGCTTCCAGT | ACACTCCAGCTGGGTGTAACATCCCC   | TCAGTTGAGCTTCCAGT |
| mmu-miR-99a-5p  | AACCCUGAGAUCCGACUUGUG   | CTCAACTGGTGTCTGGAGTCGGCAATTCAGTTGAGCACAAGAT | ACACTCCAGCTGGGAACCGTAGATCC   | TCAGTTGAGCACAAGAT |
| mmu-miR-10b-5p  | UACCCUGUAGAACCAGAAUUGUG | CTCAACTGGTGTCTGGAGTCGGCAATTCAGTTGAGCACAATTC | ACACTCCAGCTGGGTACCCGTAGAAC   | TCAGTTGAGCACAATTC |
| mmu-miR-7f-5p   | UGAGGUAGUAGAUUGUAGUUGU  | CTCAACTGGTGTCTGGAGTCGGCAATTCAGTTGAGAACTATAC | ACACTCCAGCTGGGTGAGGTAGTAGAT  | TCAGTTGAGAACTATAC |
| mmu-miR-126a-3p | UCGUACCGUGAGUAAUUAUGCG  | CTCAACTGGTGTCTGGAGTCGGCAATTCAGTTGAGCGCATTAT | ACACTCCAGCTGGGTGTAACCGTAGT   | TCAGTTGAGCGCATTAT |
| mmu-miR-7b-5p   | UGAGGUAGUAGUUGUUGUGUU   | CTCAACTGGTGTCTGGAGTCGGCAATTCAGTTGAGAACACAC  | ACACTCCAGCTGGGTGAGGTAGTAGGT  | TCAGTTGAGAACACAC  |
| mmu-miR-7c-5p   | UGAGGUAGUAGUUGUUGUGUU   | CTCAACTGGTGTCTGGAGTCGGCAATTCAGTTGAGAACACAC  | ACACTCCAGCTGGGTGAGGTAGTAGGT  | TCAGTTGAGAACACAC  |

**Supplementary Table S4:** List of the most frequently sequenced miRNAs in EVs isolated from control thyroids, with the associated count per million (CPM).

| Name               | Mean CPM |
|--------------------|----------|
| <b>miR-125b-5p</b> | 213400   |
| <b>let-7c-5p</b>   | 100233   |
| <b>let-7b-5p</b>   | 83644    |
| <b>let-7f-5p</b>   | 76620    |
| <b>miR-125a-5p</b> | 66392    |
| <b>let-7a-5p</b>   | 58649    |
| <b>miR-126a-3p</b> | 40698    |
| <b>miR-30d-5p</b>  | 37117    |
| <b>miR-29a-3p</b>  | 35818    |
| <b>miR-16-5p</b>   | 34094    |

|                    |       |
|--------------------|-------|
| <b>miR-148a-3p</b> | 31128 |
| <b>let-7i-5p</b>   | 29743 |
| <b>miR-26a-5p</b>  | 23394 |
| <b>miR-199a-3p</b> | 19919 |
| <b>miR-30a-5p</b>  | 16369 |
| <b>miR-143-3p</b>  | 16316 |
| <b>let-7e-5p</b>   | 13416 |
| <b>miR-200a-3p</b> | 11859 |
| <b>miR-191-5p</b>  | 11082 |
| <b>miR-26b-5p</b>  | 10077 |

**Supplementary Table S5:** List of the most frequently sequenced miRNAs in EVs isolated from doxycycline-treated thyroids after 2 days of injections, with the associated count per million (CPM).

| <b>Name</b>        | <b>Mean CPM</b> |
|--------------------|-----------------|
| <b>miR-125b-5p</b> | 147446          |
| <b>let-7f-5p</b>   | 75838           |
| <b>let-7b-5p</b>   | 73932           |
| <b>let-7c-5p</b>   | 72227           |
| <b>let-7a-5p</b>   | 56754           |
| <b>miR-126a-3p</b> | 43233           |
| <b>miR-125a-5p</b> | 42283           |
| <b>let-7i-5p</b>   | 39875           |
| <b>miR-16-5p</b>   | 39776           |
| <b>miR-29a-3p</b>  | 37769           |
| <b>miR-148a-3p</b> | 30527           |
| <b>miR-30d-5p</b>  | 25504           |
| <b>miR-21a-5p</b>  | 21269           |
| <b>miR-199a-3p</b> | 20696           |
| <b>miR-26a-5p</b>  | 19705           |
| <b>miR-143-3p</b>  | 19673           |
| <b>miR-30a-5p</b>  | 15666           |
| <b>let-7e-5p</b>   | 14275           |
| <b>miR-221-3p</b>  | 10761           |
| <b>miR-200a-3p</b> | 10619           |

**Supplementary Table S6:** List of the most frequently sequenced miRNAs in EVs isolated from doxycycline-treated thyroids after 4 days of injections, with the associated count per million (CPM).

| <b>Name</b>        | <b>Mean CPM</b> |
|--------------------|-----------------|
| <b>miR-125b-5p</b> | 113447          |
| <b>miR-126a-3p</b> | 52815           |

|                    |       |
|--------------------|-------|
| <b>let-7b-5p</b>   | 52375 |
| <b>let-7c-5p</b>   | 48836 |
| <b>miR-16-5p</b>   | 47741 |
| <b>let-7f-5p</b>   | 47140 |
| <b>miR-21a-5p</b>  | 41538 |
| <b>let-7a-5p</b>   | 38777 |
| <b>let-7i-5p</b>   | 38526 |
| <b>miR-125a-5p</b> | 26307 |
| <b>miR-29a-3p</b>  | 24603 |
| <b>miR-199a-3p</b> | 15656 |
| <b>miR-143-3p</b>  | 13213 |
| <b>miR-221-3p</b>  | 13163 |
| <b>miR-30d-5p</b>  | 12642 |
| <b>let-7e-5p</b>   | 11214 |
| <b>miR-26a-5p</b>  | 11184 |
| <b>miR-191-5p</b>  | 9513  |
| <b>miR-146b-5p</b> | 8998  |
| <b>miR-23a-3p</b>  | 8789  |

**Supplementary Table S7:** List of miRNAs with a differential abundance, expressed in logFC, in EVs isolated at day 2 and day 4, as compared to control thyroids. MiRNAs marked with a “\*” also present a differential abundance in the day 4 and day 2 samples.

| <b>Name</b>          | <b>2*24h vs CTL</b> | <b>4*24h vs CTL</b> |
|----------------------|---------------------|---------------------|
| <b>miR-31-5p *</b>   | 4.127               | 5.472               |
| <b>miR-135b-5p *</b> | 2.830               | 3.913               |
| <b>miR-21a-3p</b>    | 3.110               | 3.643               |
| <b>miR-21a-5p *</b>  | 2.465               | 3.466               |
| <b>miR-146b-5p</b>   | 3.102               | 3.360               |
| <b>miR-155-5p *</b>  | 1.584               | 3.081               |
| <b>miR-223-5p</b>    | 2.426               | 3.066               |
| <b>miR-5099</b>      | 2.046               | 2.970               |
| <b>miR-223-3p *</b>  | 1.783               | 2.924               |
| <b>miR-142a-5p *</b> | 1.354               | 2.669               |
| <b>miR-20a-5p</b>    | 1.914               | 2.582               |
| <b>miR-142a-3p *</b> | 1.574               | 2.533               |
| <b>miR-184-3p</b>    | 1.877               | 2.263               |
| <b>miR-221-3p</b>    | 1.874               | 2.207               |
| <b>miR-218-5p</b>    | 1.655               | 1.917               |
| <b>miR-484</b>       | 1.477               | 1.843               |

|                        |        |        |
|------------------------|--------|--------|
| <b>miR-674-5p</b>      | 1.270  | 1.647  |
| <b>miR-125b-1-3p *</b> | 0.825  | 1.646  |
| <b>miR-222-3p</b>      | 1.220  | 1.511  |
| <b>miR-125a-5p</b>     | -0.665 | -1.303 |
| <b>miR-206-3p</b>      | -1.365 | -1.490 |
| <b>miR-200c-3p *</b>   | -0.639 | -1.786 |
| <b>miR-204-5p *</b>    | -1.040 | -2.773 |
